# Supplementary material for: Understanding Consumer Travel Behavior during COVID-19
Source: MDPI journal article supplement (doi:10.3390/su132313330), 2021-12-01
Supplement: s1 [file s1]

Archive with 1 entries (1 files):
- sustainability-1389601-supplementary.pdf
