# Supplementary material for: Understanding Consumer Travel Behavior during COVID-19
Source: MDPI journal article supplement (doi:10.3390/su132313330), 2021-12-01
Supplement: s1 [file s1 › sustainability-1389601-supplementary.pdf]

## Travel Cognition After Coronavirus Outbreak

Dear Respondents,

This questionnaire asks for your thoughts about your possible travel in the 12 months after the coronavirus outbreak. Some questions ask how important something is (1 = not at all important; 5 = extremely important), and some questions ask how likely something is (1 = not at all likely; 5 = extremely likely). Some questions also give you the chance to add some further thoughts or comments.

There are no right or wrong answers. We also ask for a little information about yourself, to help group and understand your answers in the following analysis. Your answers are confidential, and they will be grouped with those of many other people. Thank you.

### Questions

|                                                                                                                                          | Not At All Important | Somewhat Important | Important | Very Important | Extremely Important |
|------------------------------------------------------------------------------------------------------------------------------------------|----------------------|--------------------|-----------|----------------|---------------------|
| If you travel, how important will it be that at your destination there is a good health system that you can access.                      |                      |                    |           |                |                     |
| If you travel, how important will it be that at your accommodation there is good cleaning and infection control of rooms and facilities. |                      |                    |           |                |                     |
| If you travel, how important will it be that at your destination, there is good management of people not to be crowds by authorities     |                      |                    |           |                |                     |
| If you travel, how important will it be that you can obtain good insurance coverage                                                      |                      |                    |           |                |                     |
| If you travel, how important will it be that you take with you extra masks and hand sanitizer?                                           |                      |                    |           |                |                     |
| If you travel, how important will meeting new people/ getting together with others be?                                                   |                      |                    |           |                |                     |
| If you travel, how important will seeing new sights be?                                                                                  |                      |                    |           |                |                     |
| If you travel, how important will having new culture experiences be?                                                                     |                      |                    |           |                |                     |

|                                                                                      |  |
|--------------------------------------------------------------------------------------|--|
| If you travel, what will be the most important thing to you?                         |  |
| If you have other comments about what will be important, then please give them here? |  |

|                                                                                                                 | Not At All Likely | Somewhat Likely | Likely | Very Likely | Extremely Likely |
|-----------------------------------------------------------------------------------------------------------------|-------------------|-----------------|--------|-------------|------------------|
| How likely is it you will travel outside your own city or town or village, but inside your state, in next year? |                   |                 |        |             |                  |
| How likely is it you will travel outside your state, but domestic travel in next year?                          |                   |                 |        |             |                  |
| How likely is it you will travel to another country, outside your country in next year?                         |                   |                 |        |             |                  |
| If you travel, how likely is it that you will travel in an organized group tour in next year?                   |                   |                 |        |             |                  |
| If you travel, how likely is it that you will travel with a small group of friends in next year?                |                   |                 |        |             |                  |
| If you travel, how likely is it that you will travel only with family or by yourself in next year?              |                   |                 |        |             |                  |
| If you travel, how likely will it be that you will travel mostly by car in next year?                           |                   |                 |        |             |                  |
| If you travel, how likely will it be that you will travel mostly by bus or train in next year?                  |                   |                 |        |             |                  |
| If you travel, how likely will it be that you will travel mostly by plane in next year?                         |                   |                 |        |             |                  |
| If you travel, how likely will it be that you will travel mostly by cruise ship in next year?                   |                   |                 |        |             |                  |

|                                                                                                                |  |
|----------------------------------------------------------------------------------------------------------------|--|
| If you travel, which city /state are you choosing within your country in next year? And Why? (within 30 words) |  |
| If you travel, which country are you choosing outside your country in next year? And Why? (within 30 words)    |  |
| If you have other comments about what will be likely, then please give them here. And Why? (within 30 words)   |  |

## Demographic Information

1. Your gender:

- Male
- Female

2. Your age group:

- Under 20
- 21-30
- 31-40
- 41-50
- 51-60
- Over 61

3.The state and city you live in: \_\_\_\_\_

4. Your profession:

- student
- teacher
- official
- officer
- Freelance work
- Retired

5. In the 12 months before the coronavirus outbreak, the number of times you have travelled in your country is?

- None
- 1-3 times
- 4-6 times
- 7-10 times
- More than 11 times

6. In the 12 months before the coronavirus outbreak, the number of times I have travelled outside your country is?

- None
- 1-3 times
- 4-6 times
- 7-10 times
- More than 11 times

7. In the 12 months before the coronavirus outbreak, I travelled to

- Outside country
- Outside state/city
- Inside state/city
- Not going out

Thank you for participating in the Survey.
